# Supplementary material
Source: PubMed Central journal article supplement (PMC3031759)
Supplement: NIHMS257140-supplement-01.pdf [file NIHMS257140-supplement-01.pdf]

## Supplementary Table 1

Brain Regions That Are Jointly Associated With Greater Positive Functional Connectivity With the Posterior Cingulate and Systolic Blood Pressure Reactivity. Next to each left (L) and right (R) region and approximate Brodmann area (BA) are the MNI coordinates (for the peak voxel in each cluster), where x = right (+) to left (-); y = anterior (+) to posterior (-); z = superior (+) to inferior (-). The clusters in the tables are driven from a whole brain exploration study. T-values for voxels of peak activation and their corresponding cluster extents were derived from a mixed-effects analysis employing an uncorrected height threshold of  $p < 0.005$  and extent cluster threshold of  $k = 20$  voxels.

| Side | Region                | Brodmann | MNI Coordinates |      |    | Number of voxels | Peak           |
|------|-----------------------|----------|-----------------|------|----|------------------|----------------|
|      |                       | Area     | X               | Y    | Z  | in region        | <i>t</i> value |
| L    | Cuneus                | 17/18    | -12             | -102 | -2 | 4291             | 4.86           |
| L    | Angular Gyrus         | 40       | -34             | -52  | 40 | 219              | 4.77           |
| R    | Angular Gyrus         | 40       | 46              | -60  | 34 | 86               | 4.76           |
| R    | Postcentral Gyrus     | 3        | 24              | -36  | 58 | 515              | 4.29           |
| R    | Caudate / Putamen     |          | 16              | 14   | 2  | 56               | 4.24           |
| R    | Middle Temporal Gyrus | 21       | 58              | -46  | -6 | 106              | 4.20           |

|   |                         |    |     |     |     |     |      |
|---|-------------------------|----|-----|-----|-----|-----|------|
| R | Lingual Gyrus           | 18 | 18  | -76 | -16 | 314 | 4.11 |
| L | Cerebellum              |    | -44 | -58 | -30 | 218 | 4.06 |
| L | Cerebellum              |    | -36 | -78 | -26 | 54  | 3.96 |
| L | Lateral Globus Pallidus |    | -20 | -6  | -2  | 29  | 3.92 |
| L | Middle Frontal Gyrus    | 4  | -24 | 10  | 40  | 37  | 3.89 |
| L | Caudate                 |    | -18 | -28 | 22  | 29  | 3.85 |
| R | Superior Temporal Gyrus | 39 | 46  | -60 | 16  | 50  | 3.83 |
| L | Superior Frontal Gyrus  | 6  | -14 | 20  | 54  | 33  | 3.83 |
| R | Cuneus                  | 18 | 30  | -92 | -10 | 113 | 3.76 |
| L | Medial Frontal Gyrus    | 8  | -10 | 38  | 50  | 101 | 3.75 |
| R | Thalamus                |    | 18  | -12 | 14  | 43  | 3.75 |
|   | Thalamus                |    | 0   | -20 | 10  | 181 | 3.74 |
| R | Cerebellum              |    | 24  | -58 | -34 | 20  | 3.70 |
| R | Parahippocampal Gyrus   | 34 | 30  | 2   | -22 | 50  | 3.66 |
| L | Cingulate Cortex        | 24 | -18 | -18 | 48  | 24  | 3.65 |

|   |                                 |       |     |     |     |    |      |
|---|---------------------------------|-------|-----|-----|-----|----|------|
| R | Cerebellum                      |       | 2   | -54 | -30 | 57 | 3.64 |
| L | Precuneus                       | 7     | -12 | -50 | 46  | 51 | 3.62 |
| L | Insula                          | 13    | -40 | 8   | 0   | 41 | 3.60 |
| L | Superior Frontal Gyrus          | 8     | -2  | 46  | 48  | 26 | 3.56 |
| L | Anterior Cingulate Cortex       | 32    | -2  | 44  | 16  | 40 | 3.56 |
| L | Cerebellum                      |       | -14 | -44 | -38 | 28 | 3.55 |
| L | Superior Temporal Gyrus         |       | -36 | -42 | 6   | 29 | 3.54 |
| L | Lingual Gyrus                   | 18    | -26 | -78 | -12 | 26 | 3.54 |
| L | Postcentral Gyrus               | 3     | -16 | -40 | 62  | 35 | 3.50 |
| L | Putamen                         |       | -18 | 12  | -10 | 24 | 3.49 |
| L | Inferior Frontal Gyrus          | 44/45 | -58 | 18  | 20  | 23 | 3.48 |
| L | Lateral Orbitofrontal<br>Cortex | 11    | -30 | 42  | -16 | 31 | 3.39 |
| R | Superior Temporal Gyrus         | 42    | 66  | -36 | 20  | 26 | 3.38 |
| L | Precuneus                       | 31    | -14 | -60 | 32  | 22 | 3.36 |

|   |                           |    |     |     |     |    |      |
|---|---------------------------|----|-----|-----|-----|----|------|
| R | Vermis / Cerebellum       |    | 2   | -72 | -26 | 78 | 3.36 |
| R | Anterior Cingulate Cortex | 32 | 4   | 30  | 28  | 89 | 3.34 |
| L | Postcentral Gyrus         | 40 | -52 | -24 | 20  | 23 | 3.34 |
| R | Cuneus                    | 18 | 24  | -80 | 18  | 44 | 3.32 |
| L | Cerebellum                |    | -22 | -36 | -32 | 20 | 3.30 |
| R | Precentral Gyrus          | 6  | 38  | 26  | 2   | 25 | 3.24 |
| L | Middle Occipital Gyrus    | 19 | -44 | -82 | 6   | 22 | 3.15 |
| R | Inferior Frontal Gyrus    | 47 | 38  | 26  | 2   | 24 | 2.98 |
| L | Precuneus                 | 31 | -12 | -64 | 18  | 29 | 2.98 |
