# Supplementary material
Source: PubMed Central journal article supplement (PMC3031759)
Supplement: NIHMS257140-supplement-02.pdf [file NIHMS257140-supplement-02.pdf]

## Supplementary Table 2

Correlations between personality variables (t-scores) and cardiovascular reactivity parameters (averaged across the two stress tasks). SBP = systolic blood pressure; DBP = diastolic blood pressure. \*  $p < .05$ , \*\*  $p < .01$ .

|   | Neuroticism | Extraversion | Openness | Agreeableness | Conscientiousness | SBP  | DBP   |
|---|-------------|--------------|----------|---------------|-------------------|------|-------|
| 1 | 1           | -.49**       | -.32*    | -.19          | -.57**            | .10  | .11   |
| 2 |             | 1            | .38*     | .35*          | .51**             | .22  | .05   |
| 3 |             |              | 1        | .22           | .12               | .19  | .03   |
| 4 |             |              |          | 1             | .10               | .40* | .19   |
| 5 |             |              |          |               | 1                 | -.05 | .19   |
| 6 |             |              |          |               |                   | 1    | .67** |
| 7 |             |              |          |               |                   |      | 1     |
