# Supplementary material
Source: PubMed Central journal article supplement (PMC3031759)

**Figure S2.**

Default mode network (DMN) activity is hypothesized to be strongly dependent on the posterior cingulate (pCC), and deactivate in response to performing effortful cognitive tasks (Buckner et al., 2008). Given this conceptualization, in order to select a seed region for the DMN, we examined the regions of the posterior cingulate that showed the greatest deactivation during the stressor tasks that were performed subsequent to the resting state scans (see Figure S1 for a description of the stressor tasks). For each stressor task, a contrast was created for Fixation > Incongruent, and a conjunction map was created in SPM8

(Nichols et al., 2005). A region of interest analysis was performed using the cingulate regions of the AAL atlas (WFUPickAtlas), with FDR = .05. As is shown in the figure, the peak area of deactivation within the posterior cingulate was located at  $x,y,z = -6, -40, 36$ .

Given the centrality of the pCC to the DMN as well as our model of autonomic-cardiovascular control centered on the cingulate cortex, we used a seed-based connectivity approach to maximize the correlations between regions (Cole et al., 2010).

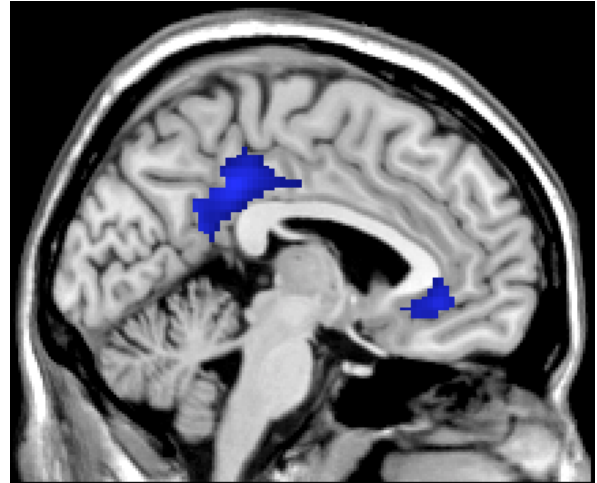

Supplement: NIHMS257140-supplement-04.pdf [file NIHMS257140-supplement-04.pdf]
